# Supplementary material for: Photochemistry of phosphenic chloride (ClPO2): isomerization with chlorine metaphosphite (ClOPO) and reduction by carbon monoxide
Source: Royal Society of Chemistry journal article supplement (doi:10.1039/d2cp02986c), 2022-01-01
Supplement: d2cp02986c1.pdf [file d2cp02986c1.pdf]

## Supporting information

### Photochemistry of Phosphenic Chloride (ClPO<sub>2</sub>): Isomerization with Chlorine Metaphosphite (ClOPO) and Reduction by Carbon Monoxide

*Junjie Jiang,<sup>†</sup> Bifeng Zhu,<sup>†</sup> Xin Jiang,<sup>†</sup> Bo Lu,<sup>†</sup> and Xiaoqing Zeng<sup>\*†</sup>*

<sup>†</sup>Department of Chemistry, Shanghai Key Laboratory of Molecular Catalysts and  
Innovative Materials, Fudan University

#### Table of contents

|                                                                                              |    |
|----------------------------------------------------------------------------------------------|----|
| Matrix-isolation IR spectra (Figure S1).....                                                 | S2 |
| Calculated energy profiles for the conversion of ClPO <sub>2</sub> to ClOPO (Figure S2)..... | S3 |
| Calculated IR data of ClC(O)OPO (Tables S1 and S2).....                                      | S4 |
| Calculated IR data of all complexes (Table S3).....                                          | S5 |
| Calculated IR data of ClPO (Table S4).....                                                   | S6 |
| Calculated all coordinates and energies of all optimized structures.....                     | S7 |

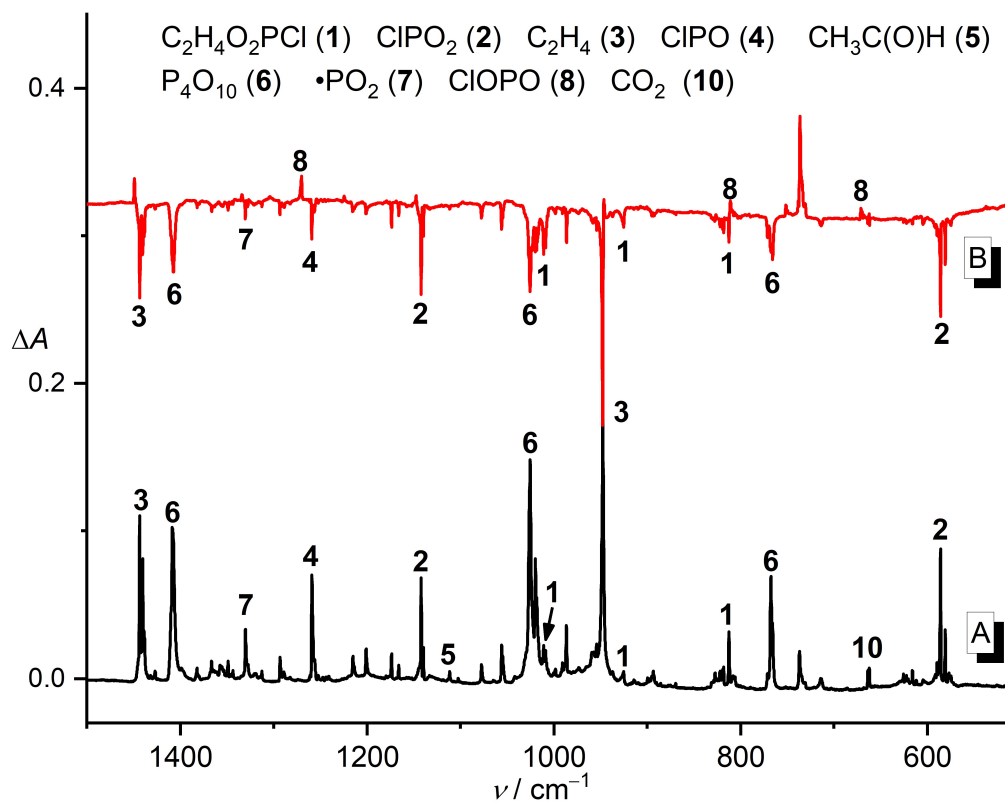

**Figure S1.** (A) IR spectrum of the high-vacuum flash pyrolysis (HVFP) products of  $C_2H_4O_2PCl$  in the solid Ar-matrix at 10 K. (B) IR difference spectrum reflecting the changes of the isolated HVFP products upon 193 nm laser irradiation (53 min).

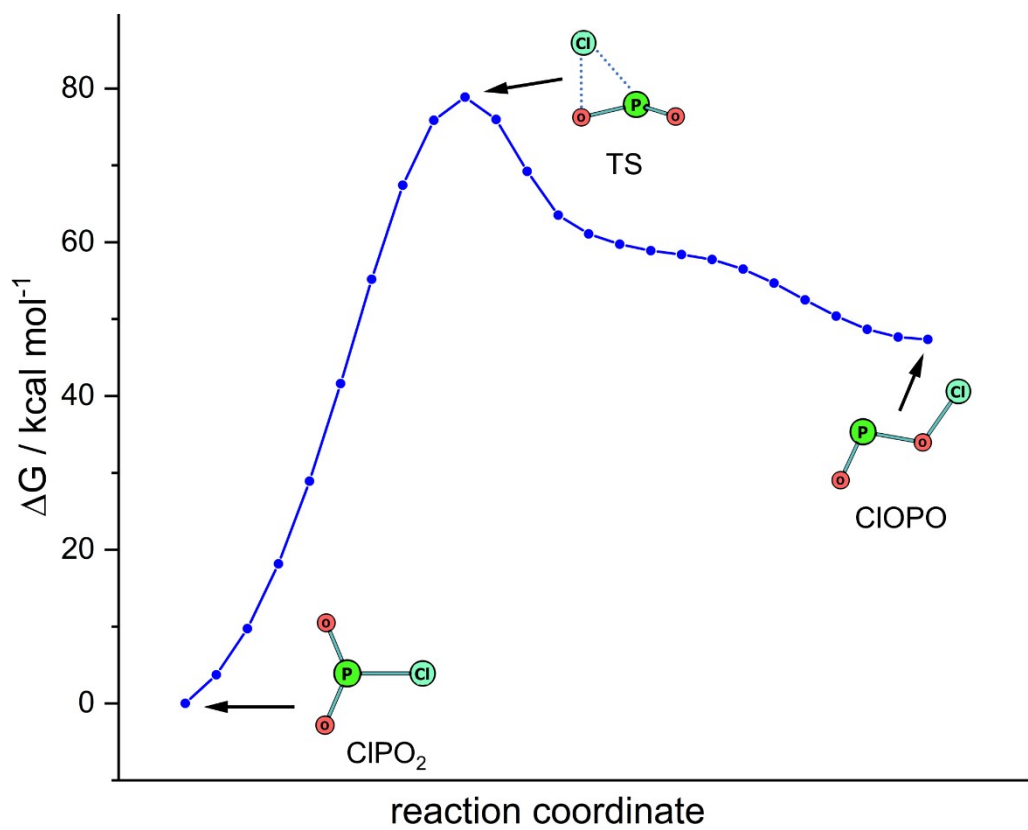

**Figure S2.** Calculated energy profile along intrinsic reaction coordinate (IRC) for the conversion of  $\text{ClPO}_2$  to  $\text{ClOPO}$  via transition state at the B3LYP/6-311+G(3df) level of theory.

**Table S1.** Calculated vibrational frequencies ( $\text{cm}^{-1}$ ) and intensities ( $\text{km mol}^{-1}$ , in parentheses) of ClC(O)OPO.

| B3LYP/6-311+G(3df)     |                       | BP86/6-311+G(3df)      |                       | MPW1PW91/6-311+G(3df)  |                       |
|------------------------|-----------------------|------------------------|-----------------------|------------------------|-----------------------|
| <i>anti</i> -conformer | <i>syn</i> -conformer | <i>anti</i> -conformer | <i>syn</i> -conformer | <i>anti</i> -conformer | <i>syn</i> -conformer |
| 44.2 (10)              | 38.7 (8)              | 44.4 (8)               | 37.0 (7)              | 47.9 (9)               | 39.9 (7)              |
| 95.1 (1)               | 81.7 (1)              | 91.0 (1)               | 76.8 (0)              | 94.6 (1)               | 85.8 (1)              |
| 139.2 (5)              | 139.6 (4)             | 132.7 (5)              | 138.2 (4)             | 141.9 (6)              | 143.7 (3)             |
| 280.4 (12)             | 309.5 (6)             | 267.8 (13)             | 295.7 (5)             | 287.9 (10)             | 317.1 (7)             |
| 390.1 (50)             | 429.6 (31)            | 372.1 (47)             | 406.0 (31)            | 400.0 (45)             | 441.0 (32)            |
| 478.3 (10)             | 473.0 (6)             | 457.0 (14)             | 449.4 (13)            | 496.0 (7)              | 487.1 (4)             |
| 678.1 (92)             | 537.8 (155)           | 648.2 (91)             | 508.9 (130)           | 693.9 (71)             | 569.7 (135)           |
| 726.7 (145)            | 680.8 (18)            | 690.2 (102)            | 650.7 (13)            | 754.1 (184)            | 695.1 (18)            |
| 817.0 (105)            | 863.9 (206)           | 783.4 (114)            | 814.3 (180)           | 839.9 (90)             | 892.6 (211)           |
| 1087.8 (972)           | 1074.0 (678)          | 1030.5 (876)           | 1028.4 (543)          | 1128.9 (971)           | 1113.9 (662)          |
| 1307.8 (67)            | 1306.7 (87)           | 1247.4 (57)            | 1244.8 (82)           | 1333.0 (66)            | 1331.4 (90)           |
| 1830.4 (353)           | 1883.4 (520)          | 1767.2 (308)           | 1824.4 (464)          | 1865.4 (350)           | 1981.6 (528)          |

**Table S2.** Calculated vibrational frequencies ( $\text{cm}^{-1}$ , scaled by a factor of 0.967) and intensities ( $\text{km mol}^{-1}$ , in parentheses) of ClC(O)OPO.

| B3LYP/6-311+G(3df)     |                       | BP86/6-311+G(3df)      |                       | MPW1PW91/6-311+G(3df)  |                       |
|------------------------|-----------------------|------------------------|-----------------------|------------------------|-----------------------|
| <i>anti</i> -conformer | <i>syn</i> -conformer | <i>anti</i> -conformer | <i>syn</i> -conformer | <i>anti</i> -conformer | <i>syn</i> -conformer |
| 42.7 (10)              | 37.4 (8)              | 42.9 (8)               | 35.7 (7)              | 46.3 (9)               | 38.5 (7)              |
| 91.9 (1)               | 79.0.7 (1)            | 87.9 (1)               | 74.2 (0)              | 91.4 (1)               | 82.9 (1)              |
| 134.6 (5)              | 134.9 (4)             | 128.3 (5)              | 133.6 (4)             | 137.2 (6)              | 138.9 (3)             |
| 271.1 (12)             | 299.3 (6)             | 258.9 (13)             | 285.9 (5)             | 278.3 (10)             | 306.6 (7)             |
| 377.2 (50)             | 425.4 (31)            | 359.8.1 (47)           | 392.6 (31)            | 386.8 (45)             | 426.4 (32)            |
| 462.5 (10)             | 457.3 (6)             | 441.9 (14)             | 434.5 (13)            | 479.6 (7)              | 471.0 (4)             |
| 655.7 (92)             | 520.0 (155)           | 626.8 (91)             | 492.1 (130)           | 671.0 (71)             | 550.8 (135)           |
| 702.7 (145)            | 658.3 (18)            | 667.4 (102)            | 629.2 (13)            | 729.2 (184)            | 672.1 (18)            |
| 790.0 (105)            | 835.3 (206)           | 757.5 (114)            | 787.4 (180)           | 812.1 (90)             | 863.1 (211)           |
| 1051.9 (972)           | 1038.5 (678)          | 996.4 (876)            | 994.4 (543)           | 1091.6 (971)           | 1077.1(662)           |
| 1264.6 (67)            | 1263.5 (87)           | 1206.2 (57)            | 1203.7 (82)           | 1289.0 (66)            | 1287.4 (90)           |
| 1769.9 (353)           | 1821.2 (520)          | 1708.8 (308)           | 1764.1 (464)          | 1803.8 (350)           | 1916.2 (528)          |

**Table S3.** Calculated vibrational frequencies ( $\text{cm}^{-1}$ ) and intensities ( $\text{km mol}^{-1}$ , in parentheses) of molecular complexes at the B3LYP/6-311+G(3df) level of theory.

| complex-1    | complex-2    | complex-3    | complex-4    | complex-5    | complex-6    | complex-7    | complex-8    |
|--------------|--------------|--------------|--------------|--------------|--------------|--------------|--------------|
| 20.7 (5)     | 13.7 (3)     | 12.7 (1)     | 8.7 (1)      | 50.3 (1)     | 27.9 (0)     | 15.1 (0)     | 11.8 (1)     |
| 38.8 (0)     | 24.7 (9)     | 31.6 (4)     | 38.5 (1)     | 55.9 (0)     | 28.3 (0)     | 16.2 (1)     | 12.1 (0)     |
| 50.8 (0)     | 56.9 (0)     | 40.5 (2)     | 68.2 (0)     | 85.8 (8)     | 64.5 (0)     | 53.1 (0)     | 36.2 (0)     |
| 85.1 (0)     | 57.7 (0)     | 59.5 (0)     | 82.2 (16)    | 185.6 (4)    | 82.2 (0)     | 61.2 (0)     | 38.8 (0)     |
| 105.1 (1)    | 111.1 (1)    | 105.7 (0)    | 96.1 (0)     | 218.1 (1)    | 84.5 (0)     | 66.0 (0)     | 44.9 (0)     |
| 308.3 (6)    | 304.6 (4)    | 312.3 (3)    | 299.5 (3)    | 304.1 (1)    | 299.6 (2)    | 301.5 (3)    | 300.4 (3)    |
| 485.9 (156)  | 485.0 (154)  | 486.2 (201)  | 473.3 (151)  | 374.8 (101)  | 384.9 (58)   | 388.7 (36)   | 388.1 (36)   |
| 669.0 (49)   | 673.2 (39)   | 669.9 (50)   | 674.3 (31)   | 388.3 (12)   | 389.9 (15)   | 389.7 (20)   | 390.1 (19)   |
| 678.5 (33)   | 678.2 (32)   | 680.2 (27)   | 676.6 (36)   | 568.0 (148)  | 573.5 (146)  | 574.6 (150)  | 574.9 (155)  |
| 1284.0 (112) | 1283.5 (113) | 1277.8 (127) | 1290.3 (109) | 1160.2 (103) | 1161.2 (102) | 1159.0 (116) | 1159.3 (114) |
| 1374.8 (0)   | 1374.8 (0)   | 1374.2 (0)   | 1374.2 (0)   | 1458.8 (141) | 1462.1 (139) | 1458.4 (145) | 1459.8 (143) |
| 2415.4 (573) | 2415.1 (615) | 2414.6 (633) | 2413.0 (631) | 2251.4 (79)  | 2207.1 (131) | 2225.6 (95)  | 2212.0 (109) |

**Table S4.** Observed and calculated IR spectra of ClPO.

| Obs. <sup>[a]</sup>    |           |           | Cal. <sup>[b]</sup> | Mode <sup>[c]</sup>   |
|------------------------|-----------|-----------|---------------------|-----------------------|
| N <sub>2</sub> -matrix | Ar-matrix | CO-matrix |                     |                       |
| 1259.3                 | 1259.0    | 1258.1    | 1288.7 (114)        | $\nu_a(\text{PO})$    |
| 489.0                  | 491.1     | 489.9     | 481.9 (166)         | $\nu(\text{P-Cl})$    |
| n.o. <sup>[d]</sup>    | n.o.      | n.o.      | 299.6 (3)           | $\delta(\text{ClPO})$ |

[a] Observed band position for the most intense matrix site. [b] Calculated frequencies at the B3LYP/6-311+G (3df) level. The IR intensities ( $\text{km mol}^{-1}$ ) are given in parentheses.

[c] Tentative assignment of the vibration modes according to the computed vibrational displacement vectors. [d] Not observed.

**Calculated atomic coordinates (in Angstroms) and energies (in Hartrees) of all optimized structures.**

**ClPO<sub>2</sub>**

B3LYP/6-311+G(3df)

|                                              |             |             |             |
|----------------------------------------------|-------------|-------------|-------------|
| P                                            | 0.65170754  | 0.91583146  | 0.00000000  |
| O                                            | -0.10069244 | 2.21902650  | 0.00000000  |
| Cl                                           | -0.36829248 | -0.85086035 | 0.00000000  |
| O                                            | 2.15650754  | 0.91583144  | 0.00000000  |
| Zero-point correction=                       |             |             | 0.009720    |
| Thermal correction to Energy=                |             |             | 0.013818    |
| Thermal correction to Enthalpy=              |             |             | 0.014762    |
| Thermal correction to Gibbs Free Energy=     |             |             | -0.017464   |
| Sum of electronic and zero-point Energies=   |             |             | -952.167251 |
| Sum of electronic and thermal Energies=      |             |             | -952.163153 |
| Sum of electronic and thermal Enthalpies=    |             |             | -952.162209 |
| Sum of electronic and thermal Free Energies= |             |             | -952.194434 |

***anti*-ClOPO**

B3LYP/6-311+G(3df)

|                                              |             |             |             |
|----------------------------------------------|-------------|-------------|-------------|
| O                                            | 2.21790500  | 0.35611400  | -0.00027100 |
| P                                            | 1.00387300  | -0.45839700 | 0.00012000  |
| O                                            | -0.24993000 | 0.63066300  | 0.00029400  |
| Cl                                           | -1.81187600 | -0.05989700 | -0.00011700 |
| Zero-point correction=                       |             |             | 0.007817    |
| Thermal correction to Energy=                |             |             | 0.012480    |
| Thermal correction to Enthalpy=              |             |             | 0.013425    |
| Thermal correction to Gibbs Free Energy=     |             |             | -0.020640   |
| Sum of electronic and zero-point Energies=   |             |             | -952.085630 |
| Sum of electronic and thermal Energies=      |             |             | -952.080967 |
| Sum of electronic and thermal Enthalpies=    |             |             | -952.080023 |
| Sum of electronic and thermal Free Energies= |             |             | -952.114088 |

***syn*-ClOPO**

B3LYP/6-311+G(3df)

|                        |             |             |             |
|------------------------|-------------|-------------|-------------|
| O                      | 1.44046100  | 1.05588500  | 0.00000100  |
| P                      | 1.24761300  | -0.39373700 | -0.00000200 |
| O                      | -0.31687200 | -0.85129200 | 0.00000300  |
| Cl                     | -1.62958200 | 0.25113700  | -0.00000100 |
| Zero-point correction= |             |             | 0.008018    |

|                                              |             |
|----------------------------------------------|-------------|
| Thermal correction to Energy=                | 0.012518    |
| Thermal correction to Enthalpy=              | 0.013462    |
| Thermal correction to Gibbs Free Energy=     | -0.020415   |
| Sum of electronic and zero-point Energies=   | -952.090569 |
| Sum of electronic and thermal Energies=      | -952.086068 |
| Sum of electronic and thermal Enthalpies=    | -952.085124 |
| Sum of electronic and thermal Free Energies= | -952.119001 |

***cyclic-ClPO<sub>2</sub>***

B3LYP/6-311+G(3df)

|                                              |             |             |             |
|----------------------------------------------|-------------|-------------|-------------|
| P                                            | 0.34270300  | -0.66919600 | -0.00203700 |
| Cl                                           | -1.52689300 | 0.20009900  | 0.00066700  |
| O                                            | 1.30081000  | 0.41726900  | -0.76492200 |
| O                                            | 1.30126900  | 0.41226300  | 0.76732300  |
| Zero-point correction=                       |             |             | 0.007802    |
| Thermal correction to Energy=                |             |             | 0.012069    |
| Thermal correction to Enthalpy=              |             |             | 0.013013    |
| Thermal correction to Gibbs Free Energy=     |             |             | -0.020096   |
| Sum of electronic and zero-point Energies=   |             |             | -952.047598 |
| Sum of electronic and thermal Energies=      |             |             | -952.043332 |
| Sum of electronic and thermal Enthalpies=    |             |             | -952.042387 |
| Sum of electronic and thermal Free Energies= |             |             | -952.075496 |

***syn-OPClO***

B3LYP/6-311+G(3df)

|                                              |             |             |             |
|----------------------------------------------|-------------|-------------|-------------|
| O                                            | -1.69676200 | 0.91602500  | 0.00032300  |
| O                                            | 1.62343900  | 0.94360700  | -0.00032600 |
| Cl                                           | -1.01711600 | -0.47693900 | -0.00022900 |
| P                                            | 1.19183700  | -0.45127200 | 0.00026100  |
| Zero-point correction=                       |             |             | 0.007141    |
| Thermal correction to Energy=                |             |             | 0.012084    |
| Thermal correction to Enthalpy=              |             |             | 0.013028    |
| Thermal correction to Gibbs Free Energy=     |             |             | -0.021895   |
| Sum of electronic and zero-point Energies=   |             |             | -952.005730 |
| Sum of electronic and thermal Energies=      |             |             | -952.000788 |
| Sum of electronic and thermal Enthalpies=    |             |             | -951.999843 |
| Sum of electronic and thermal Free Energies= |             |             | -952.034766 |

***anti-OPClO***



**B3LYP/6-311+G(3df)**

|                                              |             |             |             |
|----------------------------------------------|-------------|-------------|-------------|
| O                                            | 2.06796800  | 0.53190700  | -0.00004200 |
| O                                            | -2.07998800 | -0.46202300 | -0.00001900 |
| Cl                                           | 0.90975100  | -0.51880200 | 0.00005100  |
| P                                            | -1.02464000 | 0.55070300  | -0.00002600 |
| Zero-point correction=                       |             |             | 0.006899    |
| Thermal correction to Energy=                |             |             | 0.011975    |
| Thermal correction to Enthalpy=              |             |             | 0.012919    |
| Thermal correction to Gibbs Free Energy=     |             |             | -0.022312   |
| Sum of electronic and zero-point Energies=   |             |             | -952.006131 |
| Sum of electronic and thermal Energies=      |             |             | -952.001055 |
| Sum of electronic and thermal Enthalpies=    |             |             | -952.000111 |
| Sum of electronic and thermal Free Energies= |             |             | -952.035343 |

***syn*-CIPOO****B3LYP/6-311+G(3df)**

|                                              |             |             |             |
|----------------------------------------------|-------------|-------------|-------------|
| P                                            | 0.00000000  | 0.98624000  | 0.00000000  |
| Cl                                           | -1.40548800 | -0.46203300 | 0.00000000  |
| O                                            | 1.37105300  | 0.22529800  | 0.00000000  |
| O                                            | 1.61560900  | -1.09267700 | 0.00000000  |
| Zero-point correction=                       |             |             | 0.007491    |
| Thermal correction to Energy=                |             |             | 0.011896    |
| Thermal correction to Enthalpy=              |             |             | 0.012840    |
| Thermal correction to Gibbs Free Energy=     |             |             | -0.020853   |
| Sum of electronic and zero-point Energies=   |             |             | -951.990633 |
| Sum of electronic and thermal Energies=      |             |             | -951.986228 |
| Sum of electronic and thermal Enthalpies=    |             |             | -951.985284 |
| Sum of electronic and thermal Free Energies= |             |             | -952.018978 |

***anti*-CIPOO****B3LYP/6-311+G(3df)**

|                                            |             |             |             |
|--------------------------------------------|-------------|-------------|-------------|
| P                                          | 0.08773900  | -0.69655400 | -0.00000100 |
| Cl                                         | -1.70371300 | 0.26304500  | -0.00000800 |
| O                                          | 1.06474200  | 0.54239300  | 0.00000600  |
| O                                          | 2.39113800  | 0.20467500  | 0.00001200  |
| Zero-point correction=                     |             |             | 0.006816    |
| Thermal correction to Energy=              |             |             | 0.011550    |
| Thermal correction to Enthalpy=            |             |             | 0.012495    |
| Thermal correction to Gibbs Free Energy=   |             |             | -0.021711   |
| Sum of electronic and zero-point Energies= |             |             | -951.985012 |

|                                              |             |
|----------------------------------------------|-------------|
| Sum of electronic and thermal Energies=      | -951.980278 |
| Sum of electronic and thermal Enthalpies=    | -951.979333 |
| Sum of electronic and thermal Free Energies= | -952.013539 |

**triplet *syn*-CIPOO**

B3LYP/6-311+G(3df)

|                                              |             |             |             |
|----------------------------------------------|-------------|-------------|-------------|
| P                                            | 0.00607500  | 0.91357600  | -0.14990100 |
| Cl                                           | -1.50218200 | -0.44934900 | 0.03009400  |
| O                                            | 1.30670200  | 0.04247400  | 0.54484500  |
| O                                            | 1.87404400  | -0.80056200 | -0.32772900 |
| Zero-point correction=                       |             |             | 0.006422    |
| Thermal correction to Energy=                |             |             | 0.011335    |
| Thermal correction to Enthalpy=              |             |             | 0.012279    |
| Thermal correction to Gibbs Free Energy=     |             |             | -0.023768   |
| Sum of electronic and zero-point Energies=   |             |             | -951.975456 |
| Sum of electronic and thermal Energies=      |             |             | -951.970543 |
| Sum of electronic and thermal Enthalpies=    |             |             | -951.969599 |
| Sum of electronic and thermal Free Energies= |             |             | -952.005646 |

**triplet *anti*-CIPOO**

B3LYP/6-311+G(3df)

|                                              |             |             |             |
|----------------------------------------------|-------------|-------------|-------------|
| P                                            | 0.08173200  | -0.73643000 | -0.00000100 |
| Cl                                           | -1.69289700 | 0.26668500  | 0.00000600  |
| O                                            | 1.11052700  | 0.67662300  | -0.00005200 |
| O                                            | 2.33363200  | 0.13747800  | 0.00004100  |
| Zero-point correction=                       |             |             | 0.006545    |
| Thermal correction to Energy=                |             |             | 0.011560    |
| Thermal correction to Enthalpy=              |             |             | 0.012504    |
| Thermal correction to Gibbs Free Energy=     |             |             | -0.023912   |
| Sum of electronic and zero-point Energies=   |             |             | -951.974681 |
| Sum of electronic and thermal Energies=      |             |             | -951.969666 |
| Sum of electronic and thermal Enthalpies=    |             |             | -951.968722 |
| Sum of electronic and thermal Free Energies= |             |             | -952.005138 |

**CIPO**

B3LYP/6-311+G(3df)

|    |             |             |            |
|----|-------------|-------------|------------|
| P  | 0.00000000  | 0.83355800  | 0.00000000 |
| Cl | -0.68768500 | -1.13948600 | 0.00000000 |
| O  | 1.46133000  | 0.85848700  | 0.00000000 |

|                                              |             |
|----------------------------------------------|-------------|
| Zero-point correction=                       | 0.004717    |
| Thermal correction to Energy=                | 0.008219    |
| Thermal correction to Enthalpy=              | 0.009164    |
| Thermal correction to Gibbs Free Energy=     | -0.021776   |
| Sum of electronic and zero-point Energies=   | -876.902631 |
| Sum of electronic and thermal Energies=      | -876.899128 |
| Sum of electronic and thermal Enthalpies=    | -876.898184 |
| Sum of electronic and thermal Free Energies= | -876.929123 |

### complex-1

B3LYP/6-311+G(3df)

|                                              |              |             |             |
|----------------------------------------------|--------------|-------------|-------------|
| P                                            | 1.58381200   | -0.77031500 | 0.00061800  |
| Cl                                           | 1.20116900   | 1.28025800  | -0.00035900 |
| O                                            | 0.32142200   | -1.50921700 | -0.00286300 |
| C                                            | -2.11800900  | 0.07851500  | 0.00087100  |
| O                                            | -2.12978700  | 0.08820900  | -1.15783000 |
| O                                            | -2.12526000  | 0.08591300  | 1.15964400  |
| Zero-point correction=                       | 0.017125     |             |             |
| Thermal correction to Energy=                | 0.024947     |             |             |
| Thermal correction to Enthalpy=              | 0.025891     |             |             |
| Thermal correction to Gibbs Free Energy=     | -0.019497    |             |             |
| Sum of electronic and zero-point Energies=   | -1065.561699 |             |             |
| Sum of electronic and thermal Energies=      | -1065.553877 |             |             |
| Sum of electronic and thermal Enthalpies=    | -1065.552933 |             |             |
| Sum of electronic and thermal Free Energies= | -1065.598321 |             |             |

### complex-2

B3LYP/6-311+G(3df)

|                                            |              |             |             |
|--------------------------------------------|--------------|-------------|-------------|
| P                                          | -1.28339500  | 0.85194700  | 0.31701900  |
| Cl                                         | -1.55383000  | -1.14348000 | -0.22986500 |
| O                                          | -0.28276300  | 1.47093100  | -0.55232300 |
| C                                          | 2.17553000   | -0.22863600 | 0.15880700  |
| O                                          | 1.62566500   | -0.30681500 | 1.17873100  |
| O                                          | 2.73370500   | -0.16014500 | -0.85146000 |
| Zero-point correction=                     | 0.017039     |             |             |
| Thermal correction to Energy=              | 0.024942     |             |             |
| Thermal correction to Enthalpy=            | 0.025886     |             |             |
| Thermal correction to Gibbs Free Energy=   | -0.020560    |             |             |
| Sum of electronic and zero-point Energies= | -1065.561684 |             |             |
| Sum of electronic and thermal Energies=    | -1065.553781 |             |             |

|                                              |              |
|----------------------------------------------|--------------|
| Sum of electronic and thermal Enthalpies=    | -1065.552837 |
| Sum of electronic and thermal Free Energies= | -1065.599283 |

### complex-3

B3LYP/6-311+G(3df)

|                                              |             |             |              |
|----------------------------------------------|-------------|-------------|--------------|
| P                                            | 0.86179100  | 0.41611900  | 0.00013700   |
| Cl                                           | 2.87278500  | -0.13300300 | -0.00030000  |
| O                                            | 0.02464700  | -0.78480200 | 0.00210500   |
| C                                            | -2.80965500 | 0.09973400  | -0.00061400  |
| O                                            | -3.27279900 | -0.96008200 | -0.00145400  |
| O                                            | -2.36513200 | 1.17249100  | 0.00018900   |
| Zero-point correction=                       |             |             | 0.017009     |
| Thermal correction to Energy=                |             |             | 0.024930     |
| Thermal correction to Enthalpy=              |             |             | 0.025874     |
| Thermal correction to Gibbs Free Energy=     |             |             | -0.020689    |
| Sum of electronic and zero-point Energies=   |             |             | -1065.561164 |
| Sum of electronic and thermal Energies=      |             |             | -1065.553243 |
| Sum of electronic and thermal Enthalpies=    |             |             | -1065.552298 |
| Sum of electronic and thermal Free Energies= |             |             | -1065.598862 |

### complex-4

B3LYP/6-311+G(3df)

|                                              |             |             |              |
|----------------------------------------------|-------------|-------------|--------------|
| P                                            | 1.45132100  | -0.56348700 | -0.33105600  |
| Cl                                           | 0.87099700  | 1.43507400  | -0.04237200  |
| O                                            | 1.40930100  | -1.27253100 | 0.94588000   |
| C                                            | -2.17485300 | -0.26044200 | -0.08303400  |
| O                                            | -1.52645400 | -0.95353400 | -0.75323800  |
| O                                            | -2.82380200 | 0.42840200  | 0.58040500   |
| Zero-point correction=                       |             |             | 0.017076     |
| Thermal correction to Energy=                |             |             | 0.024931     |
| Thermal correction to Enthalpy=              |             |             | 0.025875     |
| Thermal correction to Gibbs Free Energy=     |             |             | -0.020255    |
| Sum of electronic and zero-point Energies=   |             |             | -1065.561415 |
| Sum of electronic and thermal Energies=      |             |             | -1065.553560 |
| Sum of electronic and thermal Enthalpies=    |             |             | -1065.552616 |
| Sum of electronic and thermal Free Energies= |             |             | -1065.598746 |

### complex-5

B3LYP/6-311+G(3df)

|                                              |             |             |              |
|----------------------------------------------|-------------|-------------|--------------|
| P                                            | -0.55039100 | -0.58931800 | 0.00013800   |
| O                                            | -0.41390900 | -1.14032700 | 1.33686200   |
| Cl                                           | -1.28719500 | 1.26637300  | -0.00004000  |
| O                                            | -0.41524800 | -1.14108400 | -1.33641100  |
| C                                            | 1.99419100  | 0.29664100  | -0.00043900  |
| O                                            | 3.10078700  | 0.47286000  | -0.00029500  |
| Zero-point correction=                       |             |             | 0.016179     |
| Thermal correction to Energy=                |             |             | 0.023821     |
| Thermal correction to Enthalpy=              |             |             | 0.024765     |
| Thermal correction to Gibbs Free Energy=     |             |             | -0.018103    |
| Sum of electronic and zero-point Energies=   |             |             | -1065.532834 |
| Sum of electronic and thermal Energies=      |             |             | -1065.525192 |
| Sum of electronic and thermal Enthalpies=    |             |             | -1065.524248 |
| Sum of electronic and thermal Free Energies= |             |             | -1065.567116 |

### complex-6

B3LYP/6-311+G(3df)

|                                              |             |             |              |
|----------------------------------------------|-------------|-------------|--------------|
| P                                            | -0.60692800 | 0.59628100  | -0.00204900  |
| O                                            | -0.43357300 | 1.13429800  | -1.33932200  |
| Cl                                           | -1.23515500 | -1.29284400 | -0.00073400  |
| O                                            | -0.45060300 | 1.14196200  | 1.33417200   |
| C                                            | 3.29830300  | -0.35833800 | -0.00793800  |
| O                                            | 2.17314200  | -0.37824000 | 0.01650500   |
| Zero-point correction=                       |             |             | 0.015415     |
| Thermal correction to Energy=                |             |             | 0.023614     |
| Thermal correction to Enthalpy=              |             |             | 0.024558     |
| Thermal correction to Gibbs Free Energy=     |             |             | -0.021372    |
| Sum of electronic and zero-point Energies=   |             |             | -1065.529473 |
| Sum of electronic and thermal Energies=      |             |             | -1065.521274 |
| Sum of electronic and thermal Enthalpies=    |             |             | -1065.520330 |
| Sum of electronic and thermal Free Energies= |             |             | -1065.566260 |

### complex-7

B3LYP/6-311+G(3df)

|    |             |             |             |
|----|-------------|-------------|-------------|
| P  | -1.75441400 | 0.00005400  | 0.00001900  |
| O  | -2.32372900 | -1.33643700 | 0.00001700  |
| Cl | 0.23552800  | -0.00025900 | -0.00003800 |
| O  | -2.32320800 | 1.33677100  | 0.00001700  |
| C  | 3.60713800  | 0.00018300  | -0.00012500 |
| O  | 4.73061300  | -0.00002300 | 0.00010600  |

|                                              |              |
|----------------------------------------------|--------------|
| Zero-point correction=                       | 0.015285     |
| Thermal correction to Energy=                | 0.023636     |
| Thermal correction to Enthalpy=              | 0.024580     |
| Thermal correction to Gibbs Free Energy=     | -0.023374    |
| Sum of electronic and zero-point Energies=   | -1065.527729 |
| Sum of electronic and thermal Energies=      | -1065.519379 |
| Sum of electronic and thermal Enthalpies=    | -1065.518434 |
| Sum of electronic and thermal Free Energies= | -1065.566389 |

### complex-8

B3LYP/6-311+G(3df)

|                                              |             |             |              |
|----------------------------------------------|-------------|-------------|--------------|
| P                                            | -1.68767500 | -0.00210000 | 0.00323200   |
| O                                            | -2.24877100 | -1.34175300 | 0.00824100   |
| Cl                                           | 0.30215200  | 0.00728900  | -0.01519000  |
| O                                            | -2.26147400 | 1.33215800  | 0.00873100   |
| C                                            | 4.66092200  | -0.01074400 | 0.03030900   |
| O                                            | 3.53687100  | 0.00610100  | -0.01348500  |
| Zero-point correction=                       |             |             | 0.015102     |
| Thermal correction to Energy=                |             |             | 0.023597     |
| Thermal correction to Enthalpy=              |             |             | 0.024541     |
| Thermal correction to Gibbs Free Energy=     |             |             | -0.024985    |
| Sum of electronic and zero-point Energies=   |             |             | -1065.527265 |
| Sum of electronic and thermal Energies=      |             |             | -1065.518770 |
| Sum of electronic and thermal Enthalpies=    |             |             | -1065.517826 |
| Sum of electronic and thermal Free Energies= |             |             | -1065.567352 |

### TS (from ClPO<sub>2</sub> to ClOPO)

B3LYP/6-311+G(3df)

|                                              |             |             |             |
|----------------------------------------------|-------------|-------------|-------------|
| P                                            | 0.78376100  | -0.14549600 | -0.36981600 |
| O                                            | 1.72896300  | 0.69652300  | 0.36203800  |
| Cl                                           | -1.44619200 | 0.37180200  | 0.01458900  |
| O                                            | -0.12535700 | -1.21379700 | 0.30036500  |
| Zero-point correction=                       |             |             | 0.006763    |
| Thermal correction to Energy=                |             |             | 0.011092    |
| Thermal correction to Enthalpy=              |             |             | 0.012036    |
| Thermal correction to Gibbs Free Energy=     |             |             | -0.021501   |
| Sum of electronic and zero-point Energies=   |             |             | -952.041628 |
| Sum of electronic and thermal Energies=      |             |             | -952.037300 |
| Sum of electronic and thermal Enthalpies=    |             |             | -952.036355 |
| Sum of electronic and thermal Free Energies= |             |             | -952.069892 |

***syn*-ClC(O)OPO**

B3LYP/6-311+G(3df)

|                                              |             |             |              |
|----------------------------------------------|-------------|-------------|--------------|
| C                                            | 1.01946900  | 0.63546100  | 0.01050300   |
| Cl                                           | 1.57640700  | -1.05883200 | 0.08082200   |
| O                                            | 1.76988600  | 1.53479400  | -0.10425400  |
| O                                            | -0.30970600 | 0.75593200  | 0.13485800   |
| P                                            | -1.51034100 | -0.36354200 | -0.27224300  |
| O                                            | -2.74275800 | 0.16433700  | 0.30022700   |
| Zero-point correction=                       |             |             | 0.017813     |
| Thermal correction to Energy=                |             |             | 0.024291     |
| Thermal correction to Enthalpy=              |             |             | 0.025235     |
| Thermal correction to Gibbs Free Energy=     |             |             | -0.014923    |
| Sum of electronic and zero-point Energies=   |             |             | -1065.510905 |
| Sum of electronic and thermal Energies=      |             |             | -1065.504428 |
| Sum of electronic and thermal Enthalpies=    |             |             | -1065.503483 |
| Sum of electronic and thermal Free Energies= |             |             | -1065.543642 |

***anti*-ClC(O)OPO**

B3LYP/6-311+G(3df)

|                                              |             |             |              |
|----------------------------------------------|-------------|-------------|--------------|
| C                                            | 0.84536500  | 0.40549800  | 0.07456000   |
| Cl                                           | 2.27614500  | -0.60115000 | -0.05597600  |
| O                                            | 0.87852400  | 1.58852500  | 0.12516900   |
| O                                            | -0.25459800 | -0.36994400 | 0.11851000   |
| P                                            | -1.79201400 | 0.27725900  | -0.19821000  |
| O                                            | -2.73473100 | -0.76512300 | 0.19099200   |
| Zero-point correction=                       |             |             | 0.017942     |
| Thermal correction to Energy=                |             |             | 0.024369     |
| Thermal correction to Enthalpy=              |             |             | 0.025313     |
| Thermal correction to Gibbs Free Energy=     |             |             | -0.014588    |
| Sum of electronic and zero-point Energies=   |             |             | -1065.513818 |
| Sum of electronic and thermal Energies=      |             |             | -1065.507391 |
| Sum of electronic and thermal Enthalpies=    |             |             | -1065.506447 |
| Sum of electronic and thermal Free Energies= |             |             | -1065.546348 |
